# Supplementary material for: Diagnostic significance of alternative splice variants of REST and DOPEY1 in the peripheral blood of patients with breast cancer
Source: Springer Nature journal article supplement (doi:10.1007/s13277-014-2860-6), 2014-11-26
Supplement: MOESM1 [file 13277_2014_2860_MOESM1_ESM.pdf]

**Diagnostic significance of alternative splice variants of *REST* and *DOPEY1* in the peripheral blood of patients with breast cancer**

Ave Kris Lend\*<sup>1,2</sup>, Anna Kazantseva\*<sup>1</sup>, Anri Kivil<sup>1,3</sup>, Vahur Valvere<sup>2,4</sup> and Kaia Palm<sup>2,3</sup>

<sup>1</sup>Protobios LLC, Mäealuse 4, Tallinn 12618, Estonia

<sup>2</sup>Competence Center for Cancer Research, Akadeemia tee 15, Tallinn 12618, Estonia

<sup>3</sup>The Department of Gene Technology, Tallinn University of Technology, Akadeemia tee 15, Tallinn 12618, Estonia

<sup>4</sup>Clinic of Hematology and Oncology, North Estonia Medical Center, J.Sütiste tee 19, Tallinn 13419, Estonia

To whom correspondence should be addressed: Kaia Palm, Protobios LLC, Mäealuse 4, Tallinn 12618, ESTONIA; Tel: +372 620 2222; E-mail: [kaia@protobios.com](mailto:kaia@protobios.com)

Ave Kris Lend, [avekris@protobios.com](mailto:avekris@protobios.com)

Anna Kazantseva, [anna@protobios.com](mailto:anna@protobios.com)

Anri Kivil, [anri@protobios.com](mailto:anri@protobios.com)

Vahur Valvere, [Vahur.Valvere@regionaalhaigla.ee](mailto:Vahur.Valvere@regionaalhaigla.ee)

\* These authors contributed equally

## Supplementary

**Table S1** Alternatively spliced variants of 94 genes isolated from primary breast cancer tissue using RT-PCR

| Gene name | RefSeq No    | No of ASV cloned | Corresponding ESTs     |
|-----------|--------------|------------------|------------------------|
| ACP1      | NM_007099    | 2                | Y16846<br>NM_001040649 |
| AR        | NM_000044    | 0                |                        |
| ASNS      | NM_133436    | 1                | BC030024               |
| ATF4      | NM_182810    | 0                |                        |
| BAK1      | NM_001188    | 0                |                        |
| BAX       | NM_138761    | 0                |                        |
| BCAS1     | NM_003657    | 0                |                        |
| BCL2L1    | NM_138578    | 1                | NM_001191              |
| BCL2L12   | NM_001040668 | 1                | BM556294               |
| BID       | NM_001196    | 2                | NM_197967<br>BY795459  |
| BRD3      | NM_007371    | 0                |                        |
| BTF3      | NM_001037637 | 0                |                        |
| BUB1      | NM_004336    | 1                | BF665520               |
| C18ORF8   | NM_013326    | 1                | novel                  |
| C21ORF2   | NM_004928    | 1                | novel                  |
| CA11      | NM_001217    | 3                | all novel              |
| CALML4    | NM_033429    | 0                |                        |
| CASP2     | NM_032982    | 1                | NM_032983              |
| CASP8     | NM_001228    | 0                |                        |
| CASP9     | NM_001229    | 1                | DA909628               |
| CBX3      | NM_007276    | 0                |                        |
| CCND1     | NM_053056    | 1                | novel                  |
| CCNH      | NM_001239    | 1                | AK094534               |
| CD44      | NM_001001389 | 2                | NM_001001391<br>M83325 |
| CD82      | NM_002231    | 1                | NM_001024844           |
| CIB1      | NM_006384    | 1                | BU858110               |
| CREB3L4   | NM_130898    | 1                | AY049977               |
| CSE1L     | NM_001316    | 1                | AF053642               |
| CWC27     | NM_005869    | 0                |                        |
| DDR1      | NM_013994    | 4                | all novel              |
| DHX38     | NM_014003    | 0                |                        |
| DIABLO    | NM_019887    | 0                |                        |
| DMKN      | NM_033317    | 1                | BI860500               |
| DNAJC8    | NM_014280    | 0                |                        |
| DOPEY1    | NM_015018    | 1                | BE816078               |
| EPSTI1    | NM_001002264 | 1                | DA674114               |
| FOXH1     | NM_003923    | 1                | BC051376               |
| GABRG2    | NM_198904    | 0                |                        |
| GANAB     | NM_198335    | 1                | BG746316               |
| GLRA2     | NM_002063    | 1                | novel                  |
| GPX2      | NM_002083    | 0                |                        |
| HMMR      | NM_012484    | 1                | NM_0123485             |
| HNRPA2B1  | NM_031243    | 1                | NM_002137              |
| ILK       | NM_004517    | 1                | DC302480               |
| ITGA7     | NM_002206    | 0                |                        |
| ITGB5     | NM_002213    | 0                |                        |
| KLF5      | NM_001730    | 0                |                        |
| LETMD1    | NM_015416    | 1                | AY259836               |
| LGALS9    | NM_009587    | 1                | NM_002308              |
| LSR       | NM_205834    | 0                |                        |

|           |              |   |                                    |
|-----------|--------------|---|------------------------------------|
| MAX       | NM_002382    | 1 | NM_145114                          |
| MLH1      | NM_000249    | 2 | BG036496<br>novel                  |
| MRPL18    | NM_014161    | 2 | AL037524<br>AK311391               |
| MSH2      | NM_000251    | 4 | DQ648894<br>3 novel                |
| MST1R     | NM_002447    | 0 |                                    |
| NCAM1     | NM_181351    | 0 |                                    |
| NEK3      | NM_002498    | 0 |                                    |
| NEMF      | NM_004713    | 2 | BX648598<br>BX648753               |
| NEO1      | NM_004928    | 0 |                                    |
| NEURL     | NM_004210    | 0 |                                    |
| NFIC      | NM_205843    | 2 | BX089119<br>NM_005597              |
| PARVA     | NM_018222    | 0 |                                    |
| POMT1     | NM_007171    | 2 | NM_001077365<br>DC314661           |
| POU2F3    | NM_014352    | 0 |                                    |
| PPARG     | NM_138711    | 2 | NM_138711<br>AB107271              |
| PPP1R1B   | NM_032192    | 1 | novel                              |
| PRC1      | NM_003981    | 1 | BG827840                           |
| PRPF19    | NM_014502    | 1 | AA594255                           |
| PSMD1     | NM_02807     | 0 |                                    |
| PTPN18    | NM_014369    | 0 |                                    |
| PYCARD    | NM_013258    | 0 |                                    |
| RELA      | NM_021975    | 1 | novel                              |
| REST      | NM_005612    | 1 | AF228045                           |
| RETNLB    | NM_032579    | 0 |                                    |
| RIOK1     | NM_031480    | 0 |                                    |
| SAE1      | NM_005500    | 0 |                                    |
| SDCCAG8   | NM_006642    | 1 | AF039690                           |
| SF3B2     | NM_006842    | 0 |                                    |
| SFRS7     | NM_001031684 | 0 |                                    |
| SFRS9     | NM_003769    | 0 |                                    |
| SLMO2     | NM_016045    | 0 |                                    |
| SMARCA5   | NM_003601    | 0 |                                    |
| SMARCB1   | NM_003073    | 0 |                                    |
| SMARCC1   | NM_003074    | 0 |                                    |
| SMARCC2   | NM_003075    | 4 | BG110302<br>NM_003075<br>NM_139067 |
| SNAI1     | NM_005985    | 0 |                                    |
| SPINT2    | NM_021102    | 2 | all novel                          |
| SUMF2     | NM_001042468 | 0 |                                    |
| TCOF1     | NM_000356    | 1 | NM_001008656                       |
| TFE3      | NM_006521    | 2 | all novel                          |
| TGIF1     | NM_170695    | 1 | NM_173210                          |
| TNFRSF10B | NM_003842    | 1 | NM_147187                          |
| TPD52     | NM_001025252 | 1 | AK057075                           |
| USH1C     | NM_153676    | 2 | BC016057<br>novel                  |

## Supplementary

**Table S2** qRT-PCR primers used for detection of alternatively spliced variants in the peripheral blood of breast cancer patients and healthy individuals

| <b>Primer</b>    | <b>Sense primer sequence 5'-3'</b> | <b>Antisense primer sequence 5'-3'</b> |
|------------------|------------------------------------|----------------------------------------|
| BUB1_BF665520    | TTGAGGGCCATTCTACAACA               | TGGACATAGACCAGCTTAGAACTTTC             |
| C18orf8_novel    | CGATCGATCCAGCCCTATC                | GTGCACGGTGCCACACCTTA                   |
| CASP9_DA909628   | GGAGGATTTGGTGATGTCGAGC             | TGTCACTGGGTGTGGGCAAACATA               |
| CCNH_AK094534    | GCTTCCTCATCGACTTAAAGTTA            | TGTGACAGGCAAGTTCTGTTCT                 |
| CREB3L4_DB003504 | GTGGCTCCTGGCAAGAAG                 | ACTCTCTTGAAGGCCCGG                     |
| CSE1L_AI568159   | CACCTGGCACAGTCACTTC                | CTCACCATTGATGGAACCTGC                  |
| DOPEY1_BE816078  | TTCAGCATGATGCACCTCAC               | TAGCTCCACATCACGGTTTG                   |
| NEMF_BX648598    | GTTACAATGCTGCTAAGAGG               | TGACGTCACCATCAACATC                    |
| POMT1_BF981084   | CTTTGAATCTCTGGCAGGTC               | GTAGGTGTCCTGGTGGGAATGAA                |
| PPARG_AB107271   | GAAGCCTGCATTTCTGCATTC              | GTCAACCATGGTCATTTCTAAG                 |
| PRC1_BG827840    | CGCCATGAGGAGAAGGAAC                | TGTTTTCGCATCAATTCCAC                   |
| REST_AF228045    | TGGGGTATGGATAACCATTG               | GAGGCCACATAACTGCACTG                   |
